# Supplementary material for: Analysis of lifetime death probability for major causes of death among residents in China
Source: BMC Public Health. 2020 Jul 11;20:1090. doi: 10.1186/s12889-020-09201-7 (PMC7353693; doi:10.1186/s12889-020-09201-7)
Supplement: Supplementary file 1 — Additional file 1. Age-specific mortality rate in different areas in 2004 and 2014, China. [file 12889_2020_9201_MOESM1_ESM.xls]

## Sheet: 2014
Unit	1/100,000
Area	All area						East region						Central region						Western region
Age group	Total mortality	mortality of malignant tumors	mortality of crebrovascular	mortality of heart disease	mortality of respiratory disease	mortality of injury and poisoning	Total mortality	mortality of malignant tumors	mortality of crebrovascular	mortality of heart disease	mortality of respiratory disease	mortality of injury and poisoning	Total mortality	mortality of malignant tumors	mortality of crebrovascular	mortality of heart disease	mortality of respiratory disease	mortality of injury and poisoning	Total mortality	mortality of malignant tumors	mortality of crebrovascular	mortality of heart disease	mortality of respiratory disease	mortality of injury and poisoning
0~	460.63	4.28	0.22	1.82	46.5	31.83	400.63	3.55	0.49	2.27	25.41	25.31	451.59	5.07	0	1.79	38.99	31.43	555.94	4.22	0.14	0.23	85.92	41.39
1~	49.96	4.02	0.09	0.35	4.95	22.95	35.17	4.03	0.05	0.38	2.3	15.82	47.87	3.42	0.11	0.27	4.12	22.27	73.78	4.89	0.1	0.43	9.88	33.96
5~	21.6	3.01	0.19	0.12	1.01	11.74	17.28	3.04	0.13	0.09	0.67	8.38	18.73	2.9	0.16	0.13	0.63	10.35	31.66	3.14	0.3	0.15	2	18.34
10~	26.13	3.92	0.31	0.37	0.83	14.49	20.27	3.98	0.24	0.26	0.48	10.02	24.88	4.07	0.2	0.32	0.69	14.21	34.39	3.67	0.53	0.54	1.4	20.05
15~	35.92	4.9	1.14	1.19	0.77	21.16	29.56	4.3	0.95	1.35	0.61	16.67	30.64	4.54	0.9	1.08	0.58	17.51	48.77	5.97	1.6	1.11	1.16	30.16
20~	37.71	5.04	1.51	1.78	0.8	21.8	29.27	4.54	0.95	1.4	0.57	16.24	34.74	4.91	1.54	2.1	0.71	19.53	56.03	6.06	2.39	1.91	1.28	34.38
25~	62.73	9.52	2.73	4.08	1.2	33.95	49.23	7.94	2.06	3.25	0.74	26.44	61.79	9.85	2.85	4.8	1.02	32.97	87.66	11.79	3.71	4.48	2.26	48.46
30~	85.22	17.52	6.2	9.54	1.79	36.66	66.63	15.65	4.43	5.95	1.26	27.98	79.77	15.5	6.78	7.92	1.39	34.34	126.79	23.93	8.48	9.77	3.31	55.74
35~	104.15	27	9.84	11.04	2.57	35.15	86.37	25.55	7.49	9.09	1.85	28.13	99.81	24.85	10.84	12.64	1.8	33.89	132.33	31.5	11.64	11.58	4.42	45.7
40~	174.44	53.7	21.29	20.98	4.54	46.53	145.11	49.31	16.69	17.92	2.95	37.77	167.53	50.93	22.68	23.43	3.75	43.46	227.11	64.04	26.03	21.98	7.99	63.7
45~	230.03	80.2	33.18	30.54	7.36	45.44	206.89	79.66	26.94	27.39	5.05	40.31	225.24	75.77	36.34	33.29	6.21	44.38	270.69	87.3	37.8	31.21	12.35	54.45
50~	437.09	166.66	74.76	62.92	17.2	58.94	368.12	156.42	55.1	51.05	10.66	49.32	467.82	169.73	90.62	75.96	16.12	61.69	534.71	183.48	91.52	67.66	32.67	74.93
55~	557.48	225.94	100.15	83.1	27.96	55.22	516.53	237.62	80.85	72.08	19.82	50.52	569.89	214.46	115.98	97.79	24	56.75	614.6	221.05	112.69	82.07	48.57	61.6
60~	1014.66	391.09	204.58	166.21	68.44	72.43	911.92	399.34	163.86	142.62	47.2	65.72	1039.39	374.09	237.65	193.45	57.9	73.26	1169.92	401.91	230.03	168	124.79	83.79
65~	1755.17	597.8	406.42	311.2	157.96	91.59	1630.94	643.76	346.07	277.37	112.07	86.47	1893.43	602.01	481.38	377.25	143.65	100.87	1769.49	520.92	403.28	278.36	247.8	87.55
70~	2819.95	791.99	709.95	561.13	350.94	109	2492.37	827.7	591.61	480.34	241.6	95.52	3056.94	813.72	815.58	682.45	324.68	120.83	3036.07	707.42	746.88	533.83	558.23	115.25
75~	4367.08	1018.84	1237.37	1045.89	704.37	148.57	4240.68	1102.79	1117.4	914.27	535.75	128.46	4925.06	1007.79	1366.42	1256.14	663.54	169.1	4961.3	879.72	1276.38	991.84	1072.66	156.68
80~	8051.63	1265.58	2140.42	2079.22	1446.77	239.02	7405.22	1356.12	1964.91	1866.86	1152.54	222.66	8711.39	1263.58	2398.68	2561.08	1370.8	265.99	8490.85	1077.33	2148.75	1851.87	2174.16	235.74
85+	16639.7	1435.2	3895.67	5073.8	3347.91	537.95	16633	1593.8	3850.33	4929.14	3031.86	610.38	16604.3	1323.54	4044.14	5826.57	2911.49	447.26	16706.9	1244.47	3777.85	4285.26	4702.47	509.53

## Sheet: 2004
Unit	1/100,000
Area	All area						East region						Central region						Western region
Age group	Total mortality	mortality of malignant tumors	mortality of crebrovascular	mortality of heart disease	mortality of respiratory disease	mortality of injury and poisoning	Total mortality	mortality of malignant tumors	mortality of crebrovascular	mortality of heart disease	mortality of respiratory disease	mortality of injury and poisoning	Total mortality	mortality of malignant tumors	mortality of crebrovascular	mortality of heart disease	mortality of respiratory disease	mortality of injury and poisoning	Total mortality	mortality of malignant tumors	mortality of crebrovascular	mortality of heart disease	mortality of respiratory disease	mortality of injury and poisoning
0~	1132.83	8.26	4.84	3.49	165.49	56.25	883.52	10.93	4.81	2.84	52.92	42.21	949.79	5.32	2.77	2.55	109.98	59.56	1552.23	8.6	6.92	5.03	328.1	66.46
1~	83.28	5.02	0.28	0.71	14.99	35.15	54.77	5.67	0.11	0.8	5.25	22.59	60.53	4.68	0.1	0.48	6.08	30.72	130.9	4.76	0.61	0.85	32.36	50.66
5~	34.02	3.63	0.33	0.36	1.72	20	26.58	3.98	0.2	0.13	0.74	15.41	26.92	3.62	0.22	0.35	0.69	15.98	48.71	3.31	0.56	0.59	3.77	28.68
10~	27.68	3.81	0.33	0.37	0.75	16.32	24.01	3.7	0.31	0.33	0.47	14.05	22.11	3.54	0.18	0.14	0.37	13.36	39.01	4.3	0.56	0.72	1.54	22.7
15~	52.96	7.17	0.8	1.55	1.07	32.36	47.85	6.95	0.71	1.31	0.83	29.95	46.04	6.87	0.54	1.34	0.66	28.53	68.07	7.82	1.24	2.1	1.89	40.21
20~	67.56	7.27	1.51	2.97	1.28	41.15	59.31	7.42	1.4	2.4	0.87	37.9	58.04	6.51	1.23	2.46	0.84	35.92	88.92	7.99	1.96	4.29	2.3	51.31
25~	71.18	9.61	2.31	4	1.41	39.69	61.16	8.53	1.53	3.38	1.11	36.21	62.18	8.99	2.5	3.64	1.14	35.26	92.87	11.55	2.96	5.11	2.08	48.73
30~	103.36	19.09	4.47	6.66	2.49	50.22	86.21	17.56	3.01	5.12	1.49	44.79	94.01	17.77	5.14	6.47	2.25	44.36	136.74	22.69	5.45	8.83	4.06	64.48
35~	161.96	39.74	10.64	13.04	4.85	63.86	136.88	36.07	8.76	10.86	3.1	54.79	159.12	39.57	11.96	13.81	3.92	63.25	200.29	45.03	11.5	15.06	8.46	77.18
40~	235.84	70.22	26.59	22.92	7.91	67.28	200.3	65.46	21.41	18.75	5.32	58.03	245.32	72.71	31.43	25.94	7.13	67.9	284.21	74.97	28.79	25.92	13.5	82.46
45~	324.79	115.36	46.48	34.63	14.06	63.31	296.14	118.2	38.87	29.18	9.88	59.18	329.32	113.46	55.17	38.52	11.61	62.02	367.09	113.2	47.27	38.48	24.56	72.07
50~	564.5	208.84	97.73	65.24	31.83	77.28	513.33	209.69	81.74	58.3	22.41	72.42	582.28	213.95	114.27	72.34	27.24	77.12	621.98	200.6	100.93	66.74	52.97	85.23
55~	879.35	318.27	177.62	107.07	69.4	85.13	786.06	323.9	147.66	95.48	44.84	77.74	950.31	340.52	220.77	124.45	61.24	88.19	921.66	283.47	166.46	101.9	113.16	91.6
60~	1294.46	435.08	295.34	167.6	142.64	84.85	1129.42	450.7	242.34	148.01	88.4	70.42	1367.78	449.1	353.21	195.14	123.78	92.98	1426.5	397.67	296.91	160.86	237.16	94.34
65~	2183.25	638.65	553.3	309.14	307.89	109.05	1942.93	660.61	489.61	273.64	214.27	93.29	2314.66	672.02	635.34	367.27	283.79	120.45	2381.7	562.11	545.12	288.61	482.09	118.5
70~	3873.51	942.73	1038.32	603.38	688.88	157.59	3383.67	960.24	925.29	529.65	488.49	129.54	4323.11	1028.18	1249.03	754.49	687.02	188.55	4124.68	801.42	956.86	544.15	1033.82	165.18
75~	6233.5	1178.39	1761.62	1044.96	1300.68	244.08	5831.19	1241.14	1701.37	969.1	1078.42	212.67	6940.96	1286.84	2081.53	1315.53	1291.03	303.61	6049.8	928.48	1461.71	835.69	1709.08	224.27
80~	10496	1387.59	3001.5	2007.4	2517.64	394.4	10084.6	1448.29	3005.47	1909.87	2228.12	383.01	12555.7	1668.33	3699.13	2715.31	2788.11	507.47	8915.51	978.69	2228.71	1391.49	2700.28	289.1
85+	16233.9	1334.58	4051.38	3654.2	4263.26	681.71	16598.6	1385.9	4155.99	3726.87	4201.16	776.45	19183.4	1658.7	4942.69	4963.11	4647.46	783.55	12880.2	947.17	3047.38	2315.87	4010.65	427.86
